# Supplementary material
Source: PubMed Central journal article supplement (PMC7501995)
Supplement: NIHMS1616105-supplement-2.pdf [file NIHMS1616105-supplement-2.pdf]

**Supplemental Table S1a. Related to Figure 1: Pharmacokinetic, metabolic and safety properties of SRI-37330**

| Pharmacokinetic or Safety Property                                                                   | Target Value          | SRI-37330                |
|------------------------------------------------------------------------------------------------------|-----------------------|--------------------------|
| IC <sub>50</sub><br>Compound concentration that inhibits TXNIP expression by 50%                     | < 1 µM                | 0.64 µM                  |
| CC <sub>50/72h</sub><br>Compound concentration that reduces cell viability by 50%                    | > 50 µM               | > 50 µM                  |
| Maximum tolerated dose in vivo – mouse                                                               |                       | > 800 mg/kg/d for 6 days |
| Ames mutagenicity assay                                                                              | Negative              | Negative                 |
| CYP450 inhibition                                                                                    | Negative              | Negative                 |
| Safety screen for off-target interactions including L-type calcium channels (Eurofins Cerep-Panlabs) | Negative              | Negative                 |
| hERG inhibition IC <sub>50</sub><br>Risk for long QT                                                 | > 10 µM<br>(Negative) | 26 µM<br>(Negative)      |
| Log D<br>Distribution coefficient/compound lipophilicity at pH 7.4                                   | 2-4                   | 2.6                      |
| t <sub>1/2</sub> Mouse liver microsomes                                                              |                       | 46 min                   |
| t <sub>1/2</sub> Dog liver microsomes                                                                | > 60 min              | 113 min                  |
| t <sub>1/2</sub> Human liver microsomes                                                              |                       | 116 min                  |
| Mouse hepatocyte metabolic stability (% compound remaining after 2h)                                 | > 20 %                | 22 %                     |
| t <sub>1/2</sub> Mouse in vivo PO <sub>(5mg/kg)</sub>                                                | > 1 h                 | 1.5 h                    |
| Bioavailability (%)                                                                                  | > 30 %                | 95 %                     |
| Fraction unbound to human plasma proteins                                                            | > 10%                 | 22 %                     |

# Supplemental Table S1b. Related to Figure 1: Human islet genes significantly changed by SRI-37330

| GENE          | adjusted p-value | GENE       | adjusted p-value | GENE       | adjusted p-value | GENE       | adjusted p-value |
|---------------|------------------|------------|------------------|------------|------------------|------------|------------------|
| DNAAF4-CCPG1  | 3.56E-06         | NR0B1      | 0.0016           | COL4A1     | 0.0120           | STK39      | 0.0306           |
| LRFN2         | 3.23E-11         | THBD       | 0.0017           | MLLT10     | 0.0123           | TIPARP     | 0.0306           |
| LOXL4         | 3.23E-11         | FAM181B    | 0.0017           | AC096636.1 | 0.0125           | ZNF469     | 0.0312           |
| STUM          | 1.18E-10         | SEMA6D     | 0.0017           | CLDN2      | 0.0125           | ITGB8      | 0.0312           |
| SIPA1L2       | 1.38E-10         | AP001793.1 | 0.0017           | MMP2       | 0.0125           | ZNF415     | 0.0312           |
| SULF2         | 3.72E-10         | CCDC191    | 0.0019           | THBS2      | 0.0127           | TMEM132D   | 0.0317           |
| SLC2A2        | 1.32E-09         | IGFN1      | 0.0020           | IL24       | 0.0136           | CALB1      | 0.0318           |
| KRT6B         | 8.26E-09         | KIF26B     | 0.0021           | IL17RB     | 0.0138           | LDLRAD3    | 0.0323           |
| CXCL12        | 1.73E-07         | TXNIP      | 0.0021           | NMI        | 0.0139           | CNTN2      | 0.0323           |
| WSCD2         | 2.64E-07         | PTPRU      | 0.0021           | PTPRCAP    | 0.0139           | LRRC17     | 0.0323           |
| PCDH7         | 4.95E-07         | PKP1       | 0.0022           | GNG4       | 0.0139           | TAGLN      | 0.0323           |
| GCNT4         | 8.06E-07         | GBP3       | 0.0022           | IGF1R      | 0.0140           | GLIS3      | 0.0323           |
| AC000095.2    | 2.33E-06         | AC053481.2 | 0.0022           | PTPN3      | 0.0141           | PROS1      | 0.0323           |
| ENTPD3        | 4.35E-06         | LHFPL2     | 0.0022           | HDHD2      | 0.0144           | CHRFAM7A   | 0.0323           |
| PTPRC         | 9.06E-06         | MYC        | 0.0025           | TNC        | 0.0146           | ST13P6     | 0.0325           |
| SLC14A1       | 1.10E-05         | TMEM87B    | 0.0025           | CYP27B1    | 0.0146           | MIRLET7DHG | 0.0325           |
| COL24A1       | 1.12E-05         | AL139241.1 | 0.0025           | FAM84A     | 0.0152           | AL135925.1 | 0.0326           |
| HSPB6         | 1.25E-05         | KIRREL3    | 0.0026           | WWTR1      | 0.0152           | ABO        | 0.0341           |
| POSTN         | 1.25E-05         | HIST1H2AC  | 0.0026           | LINC02447  | 0.0152           | MIR7-3HG   | 0.0344           |
| NPTX2         | 1.25E-05         | MPO        | 0.0026           | CHODL      | 0.0153           | FMRD6      | 0.0346           |
| NEFM          | 1.74E-05         | MICAL2     | 0.0027           | TRPM3      | 0.0153           | TNFAIP3    | 0.0346           |
| SFRP2         | 1.77E-05         | ALK        | 0.0027           | H2AFZ      | 0.0153           | AKR1C2     | 0.0346           |
| ISL1          | 1.92E-05         | KRT17      | 0.0027           | CPA1       | 0.0153           | MICAL2     | 0.0346           |
| TWNK          | 5.01E-05         | SLC7A2     | 0.0031           | ATP2B2     | 0.0153           | AC007368.1 | 0.0346           |
| CTGF          | 6.42E-05         | OR211P     | 0.0035           | NBL1       | 0.0154           | AL354733.3 | 0.0350           |
| SYNDIG1L      | 6.70E-05         | KIAA1549L  | 0.0036           | DUSP5      | 0.0165           | CCDC103    | 0.0350           |
| FSTL4         | 7.05E-05         | KCNMA1     | 0.0037           | AL356234.1 | 0.0170           | CTRB2      | 0.0357           |
| TRIM6         | 7.05E-05         | RGN        | 0.0038           | PYCR1      | 0.0170           | PLEKHG4    | 0.0358           |
| SPARCL1       | 7.15E-05         | SMG1P3     | 0.0043           | IBSP       | 0.0174           | SRP68      | 0.0361           |
| AMIGO3        | 7.37E-05         | TGFB11     | 0.0043           | FYN        | 0.0174           | F11        | 0.0366           |
| CPNE4         | 8.70E-05         | SCD        | 0.0043           | BCL2L1     | 0.0174           | RPS6KA1    | 0.0368           |
| EDN1          | 9.34E-05         | SLC6A6     | 0.0045           | NAV2       | 0.0182           | UBR4       | 0.0369           |
| MDGA1         | 1.17E-04         | MXD3       | 0.0045           | TJP3       | 0.0182           | GOS2       | 0.0372           |
| APCDD1L       | 1.17E-04         | SUGCT      | 0.0050           | HIST1H2BD  | 0.0192           | SHISAL1    | 0.0385           |
| KRT75         | 1.65E-04         | MDM1       | 0.0050           | ZDHHC14    | 0.0194           | THBS1      | 0.0387           |
| SLC26A9       | 1.65E-04         | HIST2H2BE  | 0.0053           | EDN3       | 0.0198           | CCND1      | 0.0396           |
| JAG1          | 2.20E-04         | CUZD1      | 0.0061           | FUT4       | 0.0202           | PRDM6      | 0.0406           |
| C2CD4A        | 2.29E-04         | LUZP2      | 0.0064           | CENPBD1P1  | 0.0212           | TPD52L2    | 0.0406           |
| PAPPA2        | 2.29E-04         | TNFRSF21   | 0.0064           | NELL2      | 0.0215           | SLC30A8    | 0.0422           |
| VLDLR         | 2.29E-04         | MUC1       | 0.0064           | CFI        | 0.0217           | SLC31A1    | 0.0422           |
| AC092647.5    | 2.29E-04         | RCOR2      | 0.0064           | CCDC136    | 0.0222           | MAFA       | 0.0423           |
| TAL1          | 2.29E-04         | PUS7       | 0.0065           | ANXA10     | 0.0225           | SUSD4      | 0.0423           |
| LRRC4         | 2.35E-04         | SYNM       | 0.0065           | APPL1      | 0.0236           | CDH1       | 0.0424           |
| RAB31L1       | 2.75E-04         | HMGN1P4    | 0.0068           | CDC25A     | 0.0237           | PNMA8B     | 0.0428           |
| GALNT14       | 3.34E-04         | EGR1       | 0.0068           | SLC26A6    | 0.0238           | PTPRT      | 0.0430           |
| IGF2-AS       | 3.84E-04         | CALD1      | 0.0074           | GRIA3      | 0.0240           | EPHA1-AS1  | 0.0434           |
| TNFSF14       | 4.04E-04         | LDHA       | 0.0074           | IGDCC4     | 0.0244           | COL3A1     | 0.0446           |
| OTOGL         | 4.89E-04         | OLMALINC   | 0.0076           | TUBB2B     | 0.0265           | PDZK1      | 0.0456           |
| ALCAM         | 4.98E-04         | NCOA3      | 0.0078           | TMEM178B   | 0.0265           | RF01957    | 0.0467           |
| CALCB         | 5.26E-04         | ENC1       | 0.0078           | SLC12A2    | 0.0267           | YIF1A      | 0.0472           |
| PDE3B         | 5.43E-04         | KCTD18     | 0.0078           | FUT2       | 0.0267           | EEF2K      | 0.0473           |
| ROBO2         | 6.33E-04         | AC084756.1 | 0.0080           | TOB1       | 0.0277           | SGPP2      | 0.0483           |
| PAPPA         | 6.71E-04         | ARMC9      | 0.0083           | MCM3AP     | 0.0279           | PALLD      | 0.0483           |
| TMOD1         | 6.71E-04         | CDH6       | 0.0097           | PNLIPRP2   | 0.0281           | FP236383.3 | 0.0483           |
| ST6GALNAC5    | 7.98E-04         | STXBP5     | 0.0097           | CXCL8      | 0.0285           | TGFB2      | 0.0483           |
| ELMO1         | 9.62E-04         | SYNDIG1    | 0.0097           | AC068888.1 | 0.0286           | FP236383.2 | 0.0483           |
| SORL1         | 9.62E-04         | BTBD11     | 0.0098           | NQO1       | 0.0292           | EPB41L2    | 0.0490           |
| TGFB3         | 0.0010           | SURF4      | 0.0098           | NLRP1      | 0.0293           | MS4A6A     | 0.0497           |
| KRT23         | 0.0010           | ATP7B      | 0.0104           | AC005785.1 | 0.0299           | CCZ1       | 0.0497           |
| MMP12         | 0.0011           | MLXIPL     | 0.0104           | RNU1-70P   | 0.0299           | CDR2       | 0.0497           |
| GREM2         | 0.0011           | RAD51-AS1  | 0.0105           | FAT3       | 0.0299           | MALAT1     | 0.0497           |
| OSTC          | 0.0011           | IL32       | 0.0107           | CMKLR1     | 0.0299           | DRAM2      | 0.0497           |
| RPL36A-HNRNPH | 0.0012           | EXTL3      | 0.0107           | MGP        | 0.0299           | TMEM130    | 0.0497           |
| SHISA9        | 0.0012           | FAM20A     | 0.0109           | TMEM108    | 0.0299           | GOLGA8N    | 0.0497           |
| H1FO          | 0.0012           | SEC61A1    | 0.0109           | NA         | 0.0299           | LRRC2      | 0.0497           |
| GCNT1         | 0.0013           | ACSM3      | 0.0110           | RGS2       | 0.0299           | SULT1C2    | 0.0497           |
| SCGN          | 0.0014           | KRT5       | 0.0115           | ANGPTL3    | 0.0305           | AC008403.1 | 0.0497           |

**Supplemental Table S1c. Related to Figure 1: Gene ontology analysis of SRI-37330-mediated changes in human islet gene expression**

|                     | <b>Biological Process*</b>                                                                          | <b>Gene of Interest*</b> | <b>P-value</b> |
|---------------------|-----------------------------------------------------------------------------------------------------|--------------------------|----------------|
| Downregulated Genes | Negative regulation of cell division (GO:0051785)                                                   | TXNIP                    | 0.02611        |
|                     | Neuron apoptotic process (GO:0051402)                                                               | NLRP1                    | 0.06403        |
|                     | Regulation of energy homeostasis (GO:2000505)                                                       | MLXIPL                   | 0.04315        |
| Upregulated Genes   | Negative regulation of intrinsic apoptotic signaling pathway in response to DNA damage (GO:1902230) | BCL2L1                   | 0.00015        |
|                     | Positive regulation of cell proliferation (GO:0008284)                                              | IGF1R                    | 0.00285        |
|                     | Response to glucose (GO:0009749)                                                                    | MAFA                     | 0.00073        |
|                     | Positive regulation of cell differentiation (GO:0045597)                                            | CTGF                     | 0.00007        |

*\*Enrichr Gene Ontology (GO) Biological Process 2017 was used and TXNIP-associated processes and genes are shown; P-values refer to the significance of the over-representation of the pathway according to Enrichr.*

**Supplemental Table S2: Related to STAR Method Details: Primers used in this study**

| <b>Description</b>            | <b>Sequence (5' – 3')</b> |
|-------------------------------|---------------------------|
| 18S 5' qPCR primer            | AGTCCCTGCCCTTTGTACACA     |
| 18S 3' qPCR primer            | GATCCGAGGGCCTCACTAAAC     |
| <b>Rat</b>                    |                           |
| TXNIP 5' qPCR primer          | CGAGTCAAAGCCGTCAGGAT      |
| TXNIP 3' qPCR primer          | TTCATAGCGCAAGTAGTCCAAGGT  |
| TXNIP E-box 5' ChIP primer    | AAGGACCAAGTAGCCAATGGG     |
| TXNIP E-box 3' ChIP primer    | GTGCTGGCCCGGAGG           |
| TXNIP Upstream 5' ChIP primer | TACCCTGGATGAGGTTTCAGG     |
| TXNIP Upstream 3' ChIP primer | CGTGGACACAGTGTGCTCTT      |
| IRS2 5' ChIP primer           | TCTCCTATTACATCCAGAACAGG   |
| IRS2 3' ChIP primer           | TCATCAGAGCCATTCACTTGTC    |
| <b>Mouse</b>                  |                           |
| TXNIP 5' qPCR primer          | CGAGTCAAAGCCGTCAGGAT      |
| TXNIP 3' qPCR primer          | TTCATAGCGCAAGTAGTCCAAGGT  |
| IGF1R 5' qPCR primer          | CGGCACAACACTACTGCTCCA     |
| IGF1R 3' qPCR primer          | CAGTTTTAGGGCAAGCGCAG      |
| CTGF 5' qPCR primer           | CCACTCTGCCAGTGGAGTTC      |
| CTGF 3' qPCR primer           | GTAATGGCAGGCACAGGTCT      |
| BCL2L1 5' qPCR primer         | TGACCACCTAGAGCCTTGGA      |
| BCL2L1 3' qPCR primer         | CTGGCCTTTCCGGCTCTC        |
| MLXIPL 5' qPCR primer         | CACTCAGGGAATACACGCCTAC    |
| MLXIPL 3' qPCR primer         | ATCTTGGTCTTAGGGTCTTCAG    |
| NLRP1 5' qPCR primer          | CACTCCAGTGAAGAGTGGG       |
| NLRP1 3' qPCR primer          | TTGTTGCAAGCAGGAGACCA      |
| GCG 5' qPCR primer            | ATCTTGCCACCAGGGACTTC      |
| GCG 3' qPCR primer            | AAGTGACTGGCACGAGATGT      |
| PCK1 5' qPCR primer           | CCCAAGGCAACTTAAGGGCTAT    |
| PCK1 3' qPCR primer           | CTGAGGTGCCAGGAGCAACT      |
| G6PC 5' qPCR primer           | TCTGCAAGAGCGCAACAGTT      |
| G6PC 3' qPCR primer           | CGGGCTAGGCAGTATGGGATA     |
| <b>Human</b>                  |                           |
| TXNIP 5' qPCR primer          | ACTCGTGTCAAAGCCGTTAGG     |
| TXNIP 3' qPCR primer          | TCCCTGCATCCAAAGCACTT      |
| IGF1R 5' qPCR primer          | TCGTGGGAGGGTTGGTGAT       |
| IGF1R 3' qPCR primer          | CCCCAGCCTGCTGTTATTTC      |
| MAFA 5' qPCR primer           | CCGCTGGCCATCGAGTAC        |
| MAFA 3' qPCR primer           | GGCTCCTTCTTCACCTCGAA      |
| CTGF 5' qPCR primer           | TGCATCCGTAATCCCAAATC      |
| CTGF 3' qPCR primer           | ATGCTGGTGCAGCCAGAAAG      |
| BCL2L1 5' qPCR primer         | GAGCTGGTGGTTGACTTTCTC     |

|                       |                          |
|-----------------------|--------------------------|
| BCL2L1 3' qPCR primer | TCCATCTCCGATTCAGTCCCT    |
| MLXIPL 5' qPCR primer | GGCGGCGACAGCCAT          |
| MLXIPL 3' qPCR primer | CCGCGGGACCTGCAA          |
| NLRP1 5' qPCR primer  | GGCTGCAAGTGAAAGACAAGAA   |
| NLRP1 3' qPCR primer  | CAGGCATGAGATCTCCTGGTTT   |
| ARRB1 5' qPCR primer  | CTGCGCGGAGAATTTGGA       |
| ARRB1 3' qPCR primer  | GGATGACCAGACGCACAGAA     |
| ARRDC3 5' qPCR primer | AGAGGAACAAAGGCGGAACA     |
| ARRDC3 3' qPCR primer | GGGCTCTCTCAAAGTCATCACAA  |
| TXN 5' qPCR primer    | CATGCCAACATTCCAGTTTTTTAA |
| TXN 3' qPCR primer    | GCTTTTCCTTATTGGCTCCAGAA  |

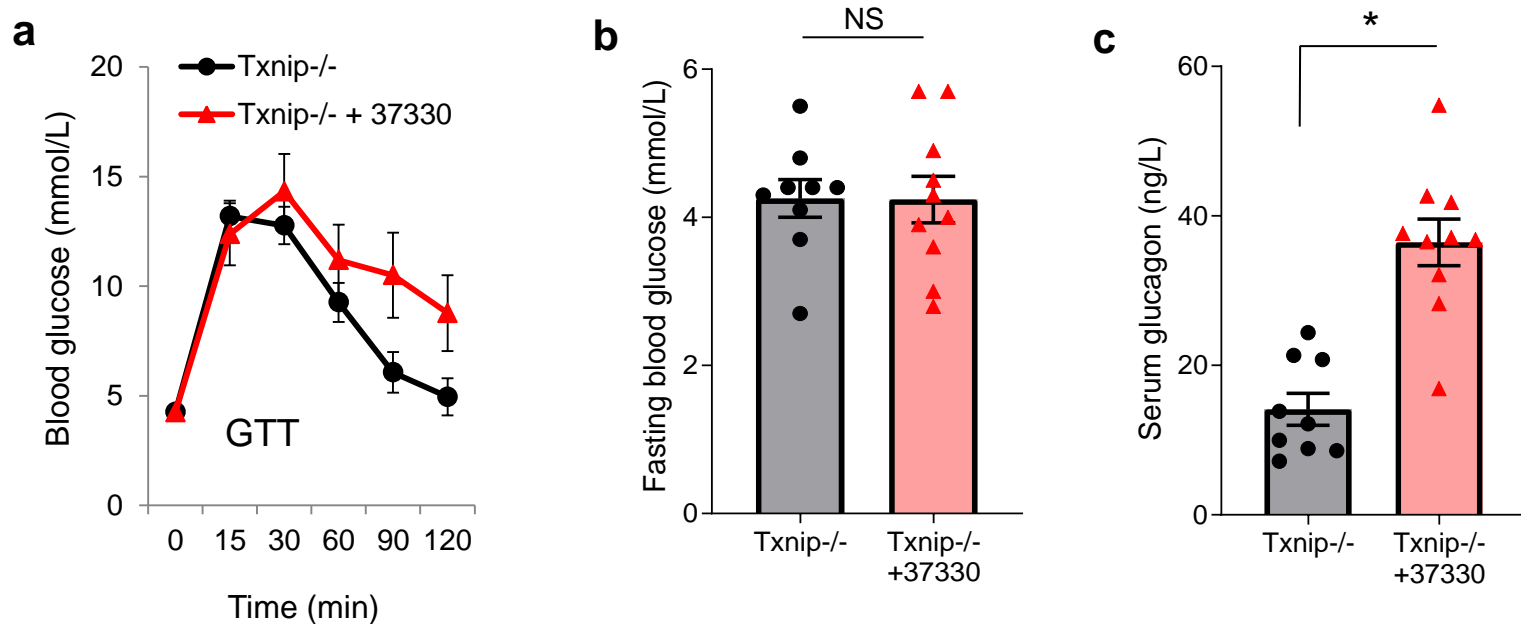

**Supplemental Figure S1. Related to Figure 3: Oral administration of SRI-37330 does not improve glucose homeostasis in the absence of TXNIP.**

**(a)** I.p. glucose tolerance tests (GTT) in TXNIP-deficient (Txnip<sup>-/-</sup>) mice treated with or without SRI-37330, ( $F_{5,85} = 2.76$ ,  $P = 0.0231$ ),  $n = 9-10$  mice per group.

**(b)** Fasting blood glucose in Txnip<sup>-/-</sup> mice treated with or without SRI-37330, (N.S.),  $n = 9-10$  mice per group.

**(c)** Fasting serum glucagon levels in Txnip<sup>-/-</sup> mice treated with or without SRI-37330, ( $t_{17} = 5.78$ ,  $*P < 0.0001$ ),  $n = 9-10$  mice per group.

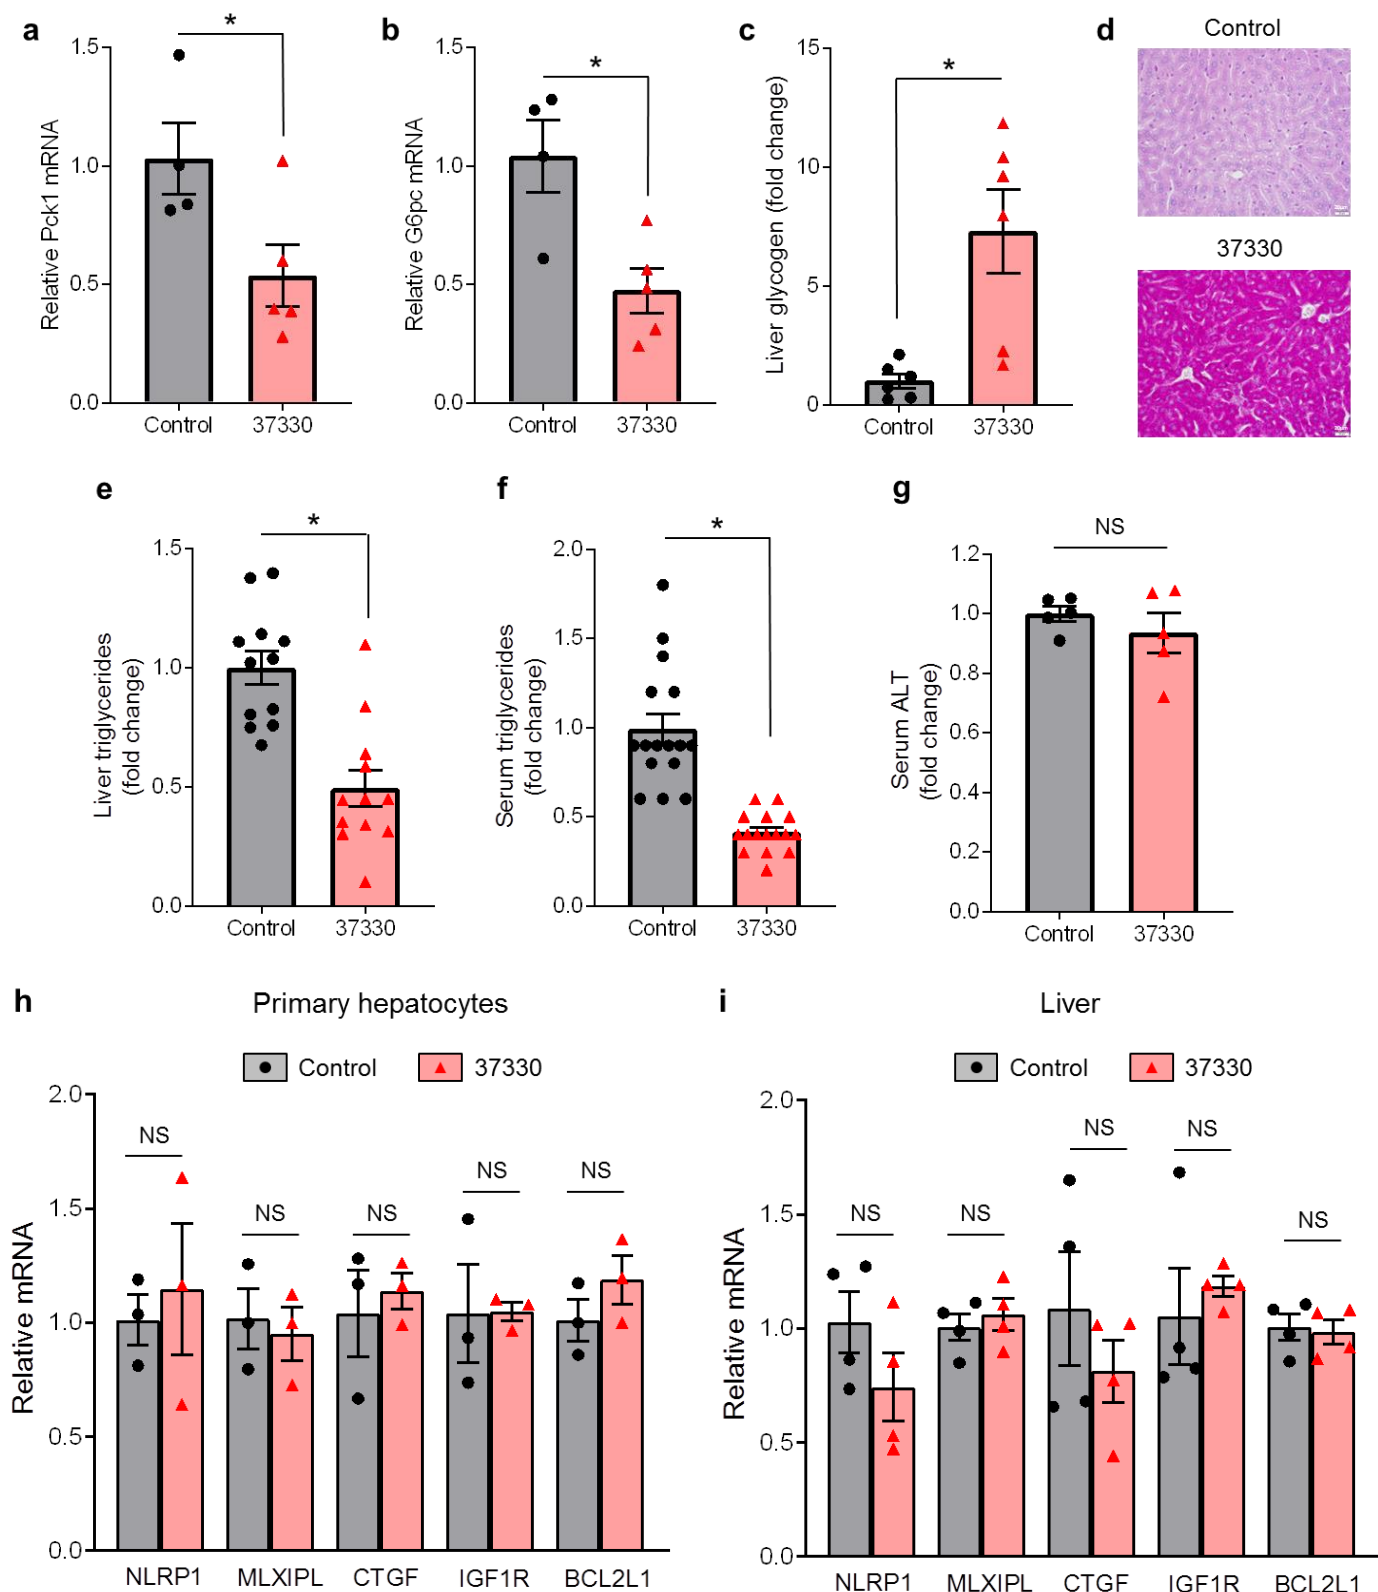

**Supplemental Figure S2. Related to Figure 3 and 5: SRI-37330 effects on the liver.**

**(a)** Expression of phosphoenolpyruvate carboxykinase (Pck1) as assessed by qPCR in livers of C57BL/6J mice treated with or without SRI-37330 ( $t_7 = 2.46$ ,  $*P = 0.0436$ ),  $n = 4-5$  mice per group.

**(b)** Expression of glucose-6-phosphatase (G6pc) in livers of SRI-37330 treated and untreated mice ( $t_7 = 3.30$ ,  $*P = 0.0131$ ),  $n = 4-5$  mice per group.

**Supplemental Figure S2. (continued)**

- (c)** Hepatic glycogen content in response to treatment with or without SRI-37330 as assessed by colorimetric assay ( $t_{10} = 3.82$ ,  $*P = 0.0019$ )  $n = 6$  mice per group.
- (d)** Representative, PAS stained, histological liver sections ( $n = 12$  total sections analyzed) of SRI-37330 treated and untreated mice, (glycogen = magenta), scale bar =  $20\mu\text{m}$
- (e)** Liver triglycerides in SRI-37330 treated and untreated mice ( $t_{22} = 4.88$ ,  $*P < 0.0001$ )  $n = 12$  mice per group.
- (f)** Serum triglycerides in SRI-37330 treated and untreated mice ( $t_{18} = 6.49$ ,  $*P < 0.0001$ ),  $n = 16$  mice per group.
- (g)** Serum levels of alanine transaminase (ALT) in SRI-37330 treated and untreated mice (N.S., not significant),  $n = 5$  mice per group.
- (h)** Expression of TXNIP-associated genes in response to SRI-37330 as assessed by qPCR in primary hepatocytes (N.S.),  $n = 3$  independent experiments.
- (i)** Liver expression of TXNIP-associated genes in response to treatment with or without SRI-37330 (N.S.),  $n = 3$  independent experiments.



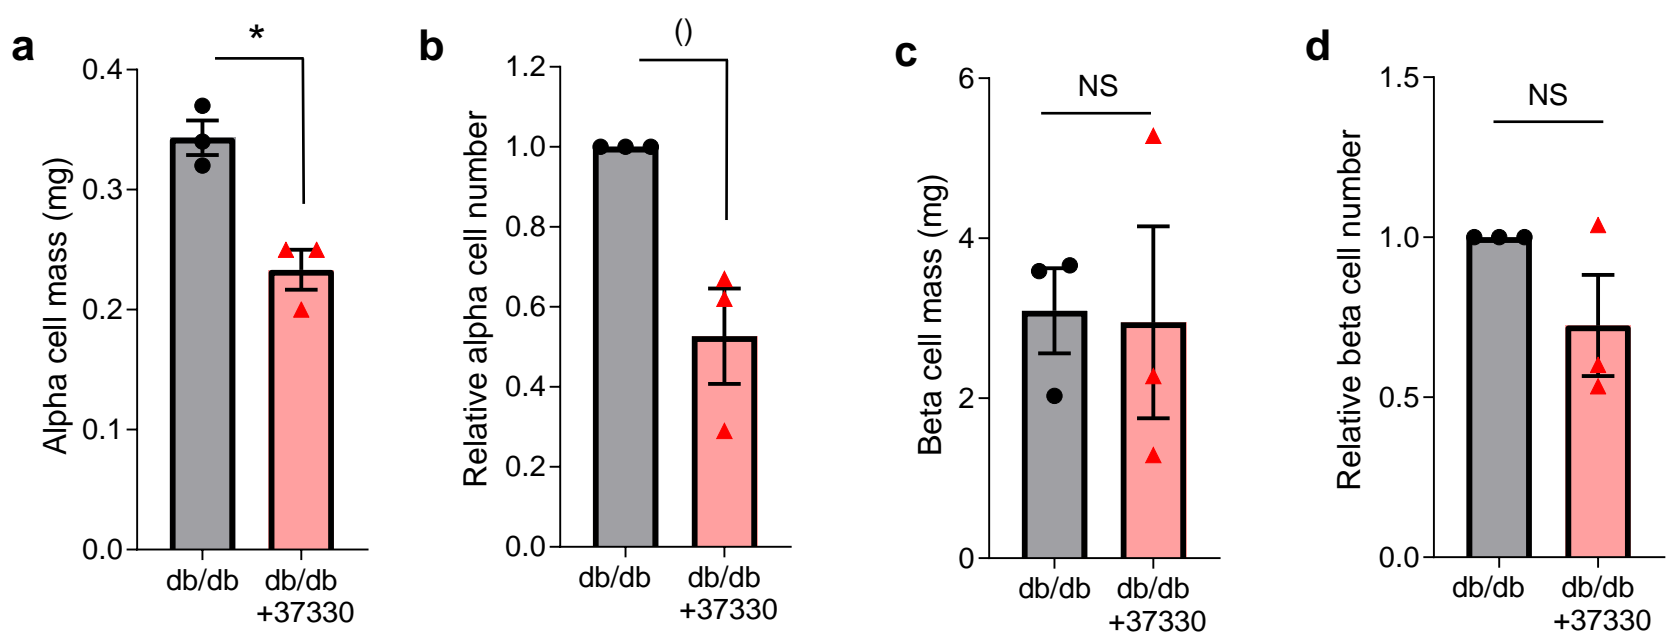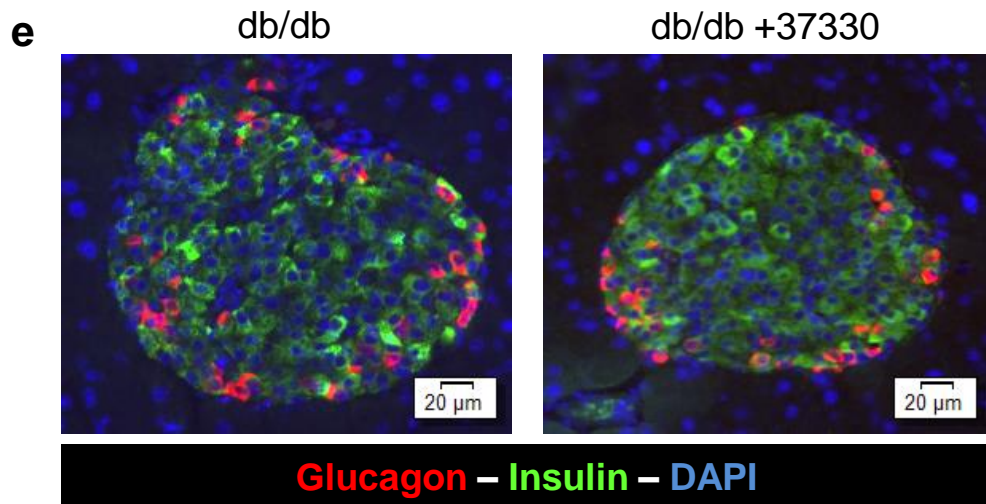

**Supplemental Figure S3. Related to Figure 6: Effects of SRI-37330 treatment on alpha and beta cell morphometry.**

**(a)** Pancreatic alpha cell mass of SRI-37330 treated and untreated *db/db* mice ( $t_4 = 4.97$ ,  $*P = 0.0076$ ),  $n = 3$  mice per group.

**(b)** Pancreatic alpha cell number of SRI-37330 treated and untreated *db/db* mice ( $t_2 = 4.00$ ;  ${}^{\circ}P = 0.0572$ ),  $n = 3$  mice per group.

**(c)** Pancreatic beta cell mass of SRI-37330 treated and untreated *db/db* mice, (N.S., not significant),  $n = 3$  mice per group.

**(d)** Pancreatic beta cell number of SRI-37330 treated and untreated *db/db* mice, (N.S.),  $n = 3$  mice per group.

**(e)** Representative islet images ( $n = 14$  sections total analyzed) of *db/db* mice treated with or without SRI-37330, scale bar = 20 $\mu$ m

**a**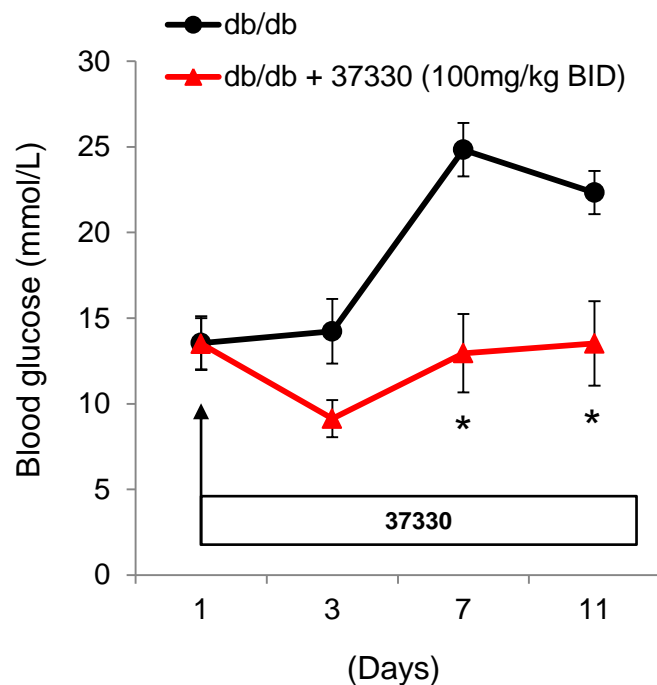**b**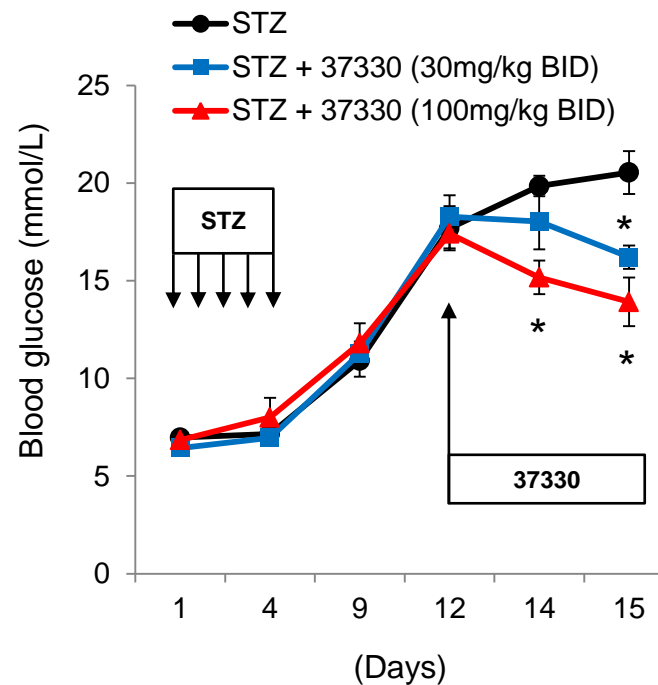

**Supplemental Figure S4. Related to Figure 7: Effects of oral gavage SRI-37330 on obesity and STZ-induced diabetes.**

**(a)** Obese, insulin resistant and diabetic male db/db mice were treated twice a day (BID) with SRI-37330 or vehicle and their non-fasting blood glucose was assessed at the designated time points ( $F_{1,44} = 17.04$ ,  $*P = 0.0002$ ),  $n = 8$  mice per group.

**(b)** C57BL/6J mice were rendered diabetic by multiple low-dose STZ injections and started receiving the designated doses of SRI-37330 by oral gavage after they had developed overt diabetes; their non-fasting blood glucose levels are shown ( $F_{10,95} = 4.92$ ,  $*P < 0.0001$ )  $n = 7-8$  mice per group.

**a**

Hit

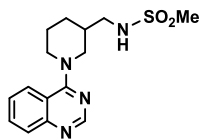*N*-(1-(quinazolin-4-yl)piperidin-3-yl)methylmethanesulfonamide

Analog

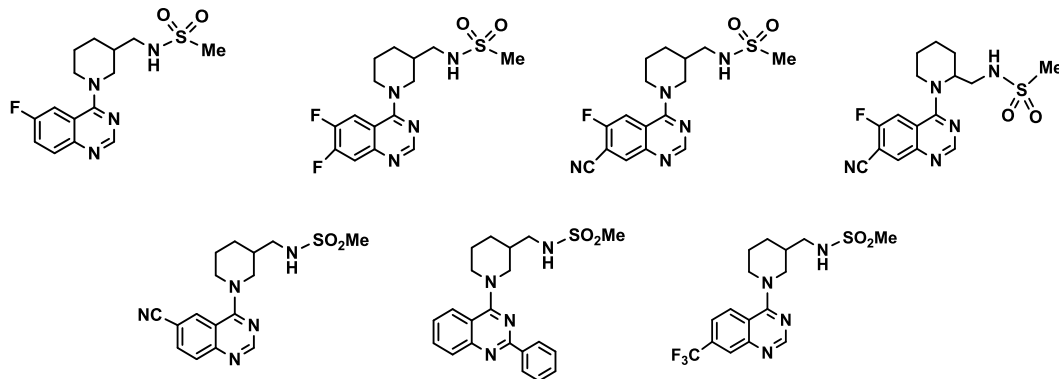

Lead

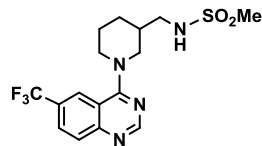*N*-((1-(6-(trifluoromethyl)quinazolin-4-yl)piperidin-3-yl)methyl) methanesulfonamide**b**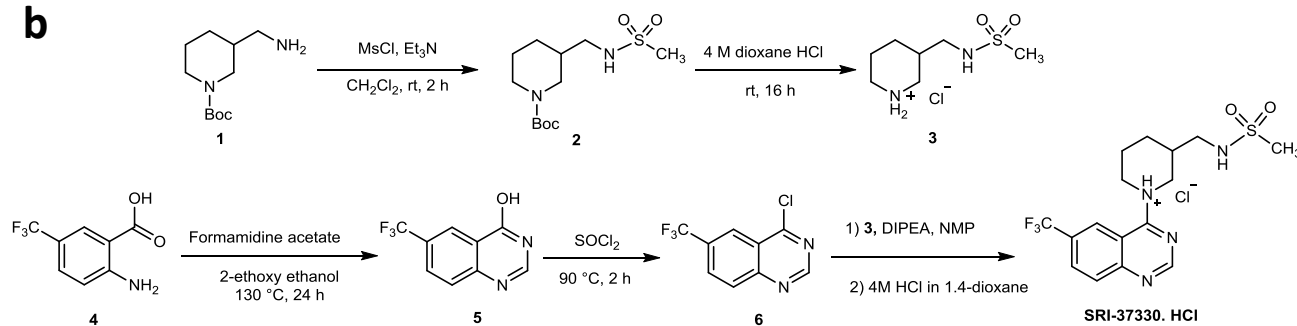

**Supplemental Figure S5.**  
**Related to high-throughput  
 screening and compound  
 synthesis sections of the  
 STAR Methods:**

**Development of SRI-37330.**

**(a)** Optimization from original hit to lead compound with a few representative analogs shown.

**(b)** Chemical synthesis pathway of SRI-37330.HCl.
